# Supplementary material
Source: MDPI journal article supplement (https://www.mdpi.com/2075-4701/12/11/1859)
Supplement: s1 [file s1]

Article,

# Lithium-Ion Battery Recycling: Metal Recovery from Electrolyte and Cathode Materials by Electrodialysis

## SUPPORTING INFORMATION

Soumaya Gmar <sup>1,2</sup>, Laurence Muhr <sup>2,\*</sup>, Florence Lutin <sup>3</sup> and Alexandre Chagnes <sup>1,\*</sup>

<sup>1</sup> GeoRessources, Université de Lorraine, CNRS, 54000 Nancy, France

<sup>2</sup> LRGP, Université de Lorraine, CNRS, 54000 Nancy, France

<sup>3</sup> Eurodia Industrie, Impasse Saint Martin, ZAC Saint Martin, 84120 Pertuis, France

\* Correspondence: laurence.muhr@univ-lorraine.fr (L.M.); alexandre.chagnes@univ-lorraine.fr (A.C.)

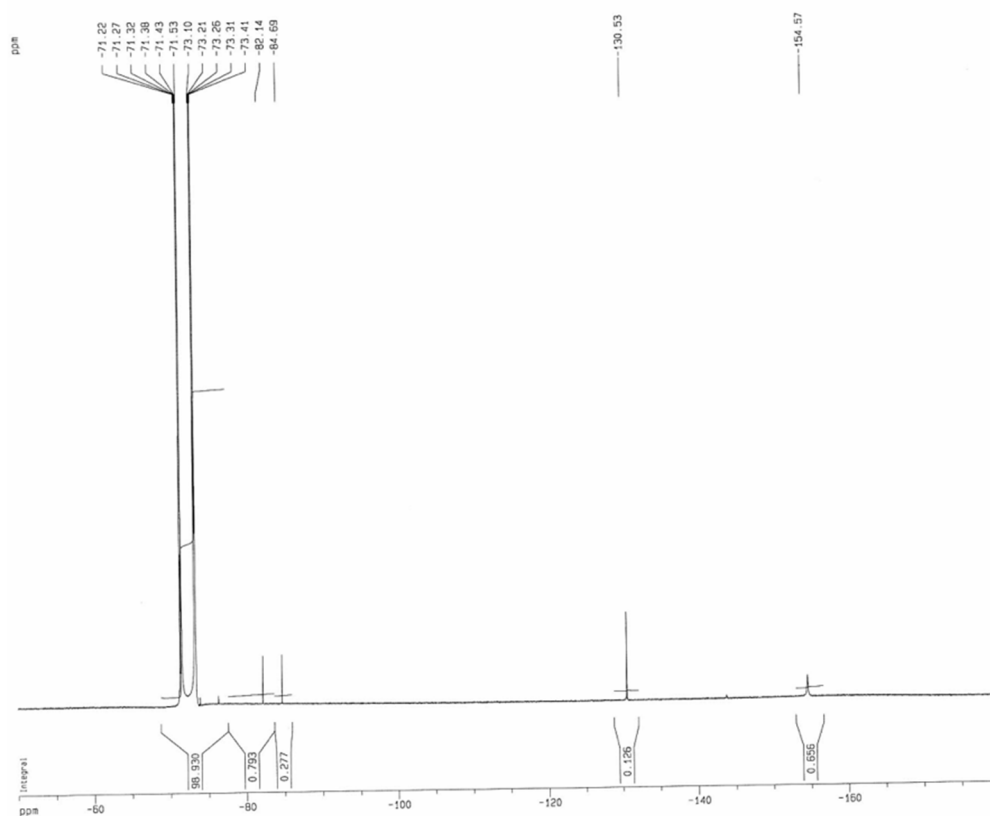

(a)

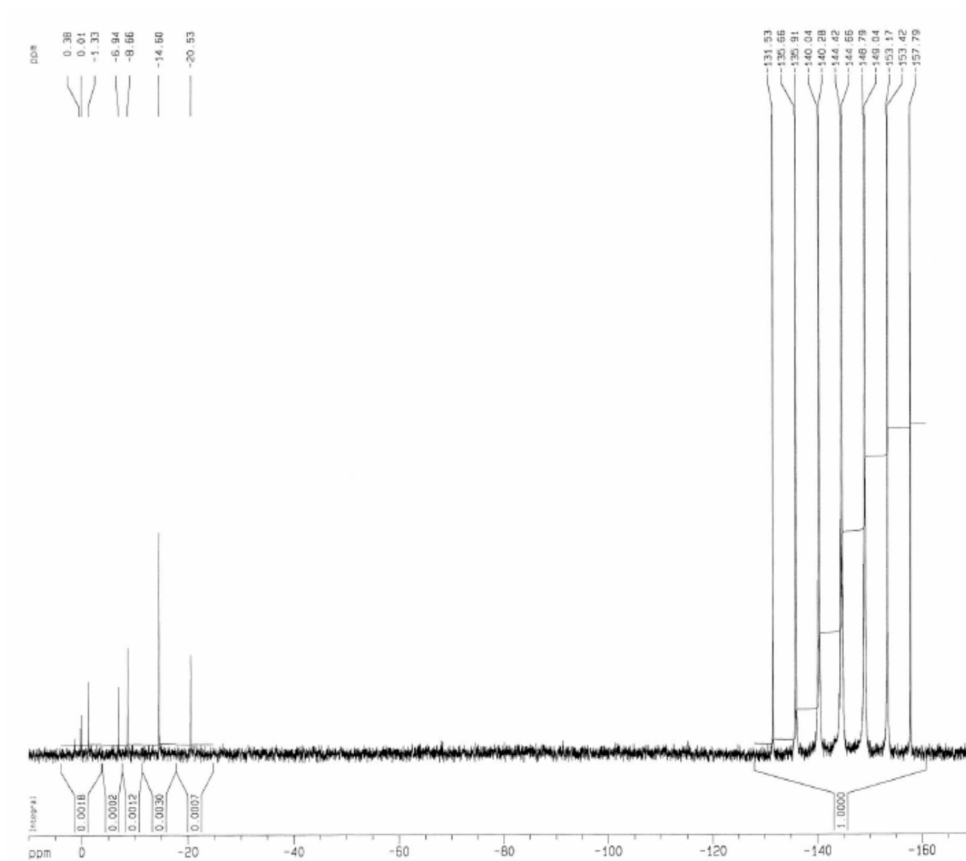

**(b)**

**Figure S1.** (a)  $^{19}\text{F}$  NMR and (b)  $^{31}\text{P}$  NMR spectra of  $10\text{ g L}^{-1}$   $\text{LiPF}_6$  in water.

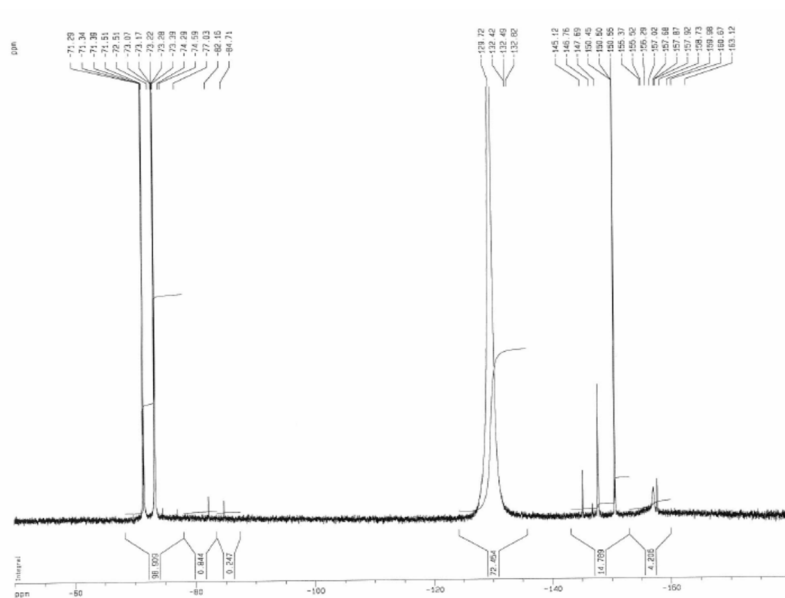

(a)

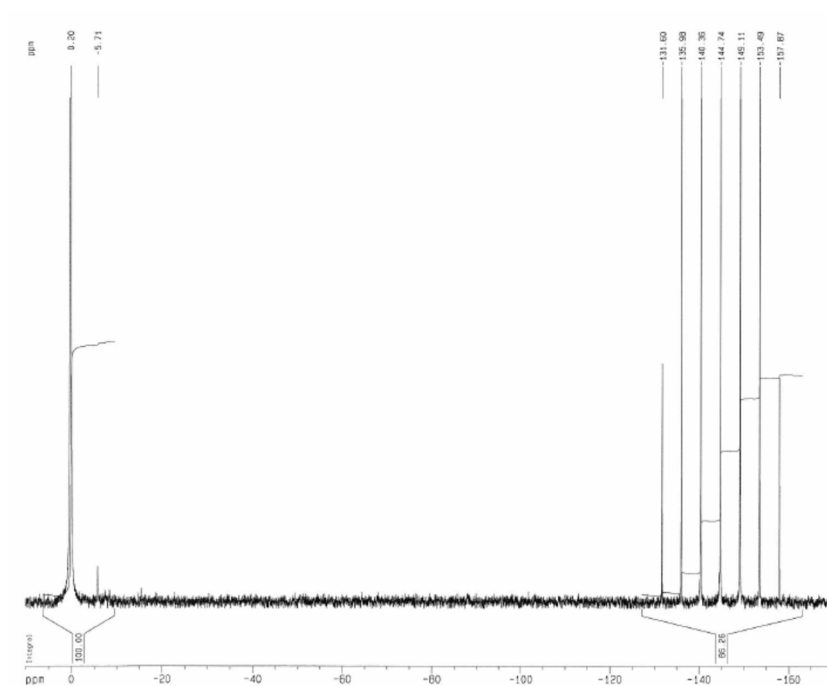

(b)

**Figure S2.** (a)  $^{19}\text{F}$  NMR and (b)  $^{31}\text{P}$  NMR spectra of 10 g/L  $\text{LiPF}_6$  in 2 mol  $\text{L}^{-1}$   $\text{H}_2\text{SO}_4$ .
